# Supplementary material for: Overcoming species barriers: an outbreak of Lagovirus europaeus GI.2/RHDV2 in an isolated population of mountain hares (Lepus timidus)
Source: BMC Vet Res. 2018 Nov 26;14:367. doi: 10.1186/s12917-018-1694-7 (PMC6258167; doi:10.1186/s12917-018-1694-7)
Supplement: Supplementary file 1 — GenBank accession number, sequence name and Lagovirus europaeus genotype (after [1]) for the vp60 gene sequences used in the phylogenetic analysis. (XLSX 22 kb) [file 12917_2018_1694_MOESM1_ESM.xlsx]

## Sheet: Table accession numbers
Additional File 1. GenBank accession number, sequence name and Lagovirus europaeus genotype (after Le Pendu et al., 2017) for the VP60 gene sequences used in the phylogenetic analysis
GenBank number	Sequence name	Genotype/variant of Lagovirus europaeus
KY293218	1662	GI.2
KY293220	1760	GI.2
KY293221	3656	GI.2
KY293225	672	GI.2
KY293226	728	GI.2
KY293227	759	GI.2
MH341502	7243	GI.2
KY293219	1663	GI.2
KY293222	5794	GI.2
MH341503	1120	GI.2
MH341504	1178	GI.2
MH341505	1251	GI.2
MH341506	1318	GI.2
MH341507	1362	GI.2
MH341508	1990	GI.2
MH341509	6216	GI.2
MH341510	8015	GI.2
MH341511	2147	GI.2
KY293217	1028	GI.2
KY293223	1421	GI.2
KY293224	3187	GI.2
MH341512	1208	GI.2
MH341513	2381	GI.2
MH341501	1874	GI.2
LT549473	E14-73	GI.2
LT168833	E13-37	GI.2
LT168834	E14-03	GI.2
LT168835	E14-40	GI.2
LT168836	E14-45	GI.2
LT168837	E14-115	GI.2
LT168838	E15-12	GI.2
LT168839	E13-22	GI.2
LT168840	E13-69	GI.2
LT168841	E13-71	GI.2
LT168842	E13-100	GI.2
LT168843	E13-122	GI.2
LT168844	E13-165	GI.2
LT168845	E14-02	GI.2
LT168846	E14-59	GI.2
LT168847	E14-114	GI.2
KM115667	CBMontijo14-1	GI.2
KM115668	CBMontijo14-2	GI.2
KM115669	CBMontijo14-3	GI.2
KM115670	CBMontijo14-4	GI.2
KM115671	CBMontijo14-5	GI.2
KM115672	CBMontijo14-6	GI.2
KM115673	CBMontijo14-7	GI.2
KM115674	CBMontijo14-8	GI.2
KM115675	CBBarrancos14-1	GI.2
KM115676	CBBarrancos14-2	GI.2
KM115677	CBEstoi13-3	GI.2
KM115679	CBEstoi13-5	GI.2
KM115680	CBEstoi13-7	GI.2
KM115681	CBEstremoz14-1	GI.2
KM115682	CBEstremoz14-3	GI.2
KM115683	CBMora14-1	GI.2
KM115684	CBMora14-2	GI.2
KM115685	CBMora14-3	GI.2
KM115686	CBMora14-4	GI.2
KM115687	CBMora14-5	GI.2
KM115688	CBMora14-6	GI.2
KM115689	CBMontemor14-1	GI.2
KM115690	CBMontemor14-2	GI.2
KM115691	CBMontemor14-3	GI.2
KM115692	CBMontemor14-4	GI.2
KM115693	CBMontemor14-5	GI.2
KM115694	CBMontemor14-6	GI.2
KM115695	CBMontemor14-7	GI.2
KM115696	CBMontemor14-8	GI.2
KM115697	CBCoruche14-1	GI.2
KM115698	CBCoruche14-2	GI.2
KM115699	CBVNovas14-1	GI.2
KM115700	CBVNovas14-3	GI.2
KM115701	CBTomar14-1	GI.2
KM115702	CBTomar14-2	GI.2
KM115703	CBTomar14-3	GI.2
KM115704	CBTomar14-4	GI.2
KM115705	CBTomar14-5	GI.2
KM115706	CBTomar14-6	GI.2
KM115707	CBTomar14-7	GI.2
KM115708	CBTomar14-8	GI.2
KM115709	CBTomar14-9	GI.2
KM115710	CBTomar14-10	GI.2
KM115711	CBLavra10-13-1	GI.2
KM115712	CBMert14-1	GI.2
KM115713	CBMert14-2	GI.2
KM115714	CBAlgarve14-1	GI.2
KM115715	CBAlgarve14-3	GI.2
KM115716	CBAlgarve14-4	GI.2
KM878681	N11	GI.2
KM979445	CBVal16Fig	GI.2
KP090976	CBAnd1Fig	GI.2
KP129395	Rij06-12	GI.2
KP129396	Seg08-12	GI.2
KP129397	Tar06-12	GI.2
KP129398	Zar06-12	GI.2
KP129399	Zar11-11	GI.2
KT000290	CBFaial15-1	GI.2
KT000291	CBSMaria15-10	GI.2
KT000292	CBSMaria15-1	GI.2
KT000293	CBSMaria15-2	GI.2
KT000294	CBSMaria15-3	GI.2
KT000295	CBSMaria15-4	GI.2
KT000296	CBSMaria15-5	GI.2
KT000297	CBSMaria15-6	GI.2
KT000298	CBSMaria15-8	GI.2
KT000299	CBSMaria15-9	GI.2
KT000300	CBSMiguel15-11	GI.2
KT000301	CBSMiguel15-12	GI.2
KT000302	CBSMiguel15-13	GI.2
KT000303	CBSMiguel15-14	GI.2
KT000304	CBSMiguel15-2	GI.2
KT000305	CBSMiguel15-3	GI.2
KT000306	CBSMiguel15-4	GI.2
KT000307	CBSMiguel15-6	GI.2
KT000308	CBSMiguel15-7	GI.2
KT000309	CBSMiguel15-8	GI.2
KT000310	CBSMiguel15-9	GI.2
KT000311	CBFlores15-1	GI.2
KT000312	CBFlores15-2	GI.2
KT000313	CBFlores15-3	GI.2
KT000314	CBFlores15-4	GI.2
KT000315	CBFlores15-5	GI.2
KT000316	CBFlores15-6	GI.2
KT000317	CBFlores15-7	GI.2
KT000318	CBFlores15-8	GI.2
KT000319	CBFlores15-9	GI.2
KT000320	CBFlores15-10	GI.2
KT000321	CBFlores15-11	GI.2
KT000322	CBFlores15-12	GI.2
KT000323	CBGraciosa14-9	GI.2
KT000324	CBGraciosa14-15	GI.2
KT000325	CBGraciosa14-17	GI.2
KT000326	CBGraciosa14-21	GI.2
KT000327	CBGraciosa14-22	GI.2
KT000328	CBGraciosa14-25	GI.2
KT000329	CBGraciosa14-27	GI.2
KT000330	CBGraciosa14-31	GI.2
KT000331	CBGraciosa14-32	GI.2
KT000332	CBGraciosa14-33	GI.2
KT000333	CBGraciosa14-34	GI.2
KT000334	CBSJorge15-1	GI.2
KT000335	CBSJorge15-2	GI.2
KT000336	CBSJorge15-3	GI.2
KT000337	CBSJorge15-6	GI.2
KT000338	CBSJorge15-7	GI.2
KT000339	CBTerceira15-2	GI.2
KT000340	CBTerceira15-3	GI.2
KT000341	CBTerceira15-4	GI.2
KT000342	CBPico15-1	GI.2
KT000343	CBPico15-2	GI.2
KT280060	BLMT-1	GI.2
KT308115	Bg12	GI.2
KT308116	Bcn14	GI.2
HE800529	10-01_France	GI.2
HE800530	10-07_France	GI.2
HE800531	10-28_France	GI.2
HE800532	10-32_France	GI.2
HE819400	10-08_France	GI.2
KC345611	Ss11	GI.2
KC345612	Vs11	GI.2
KC345613	Vs11	GI.2
KC741409	Sr12-2	GI.2
KC907712	Tn12	GI.2
KF442961	CBAlgarve1	GI.2
KF442962	CBAlgarve3	GI.2
KF442963	07-13_Portugal	GI.2
KF442964	10A-13	GI.2
KJ683895	1016-PT13	GI.2
KJ683896	1017-PT13	GI.2
KJ683897	7285-PT13	GI.2
KJ683898	7763-PT13	GI.2
KJ683899	7764-PT13	GI.2
KJ683901	16747-PT13	GI.2
MF421574	AUS/SA/MEA-1/2016	GI.2
MF421575	AUS/SA/MUN-2/2016	GI.2
MF421576	AUS/SA/TIN-2/2016	GI.2
MF421577	AUS/SA/WIT-1/2016	GI.2
MF421578	AUS/VIC/HAM-4/2016	GI.2
MF421580	AUS/ACT/ARA-1/2015	GI.2
MF421582	AUS/ACT/TUG-3/2015	GI.2
MF421581	AUS/ACT/TUG-1/2015	GI.2
MF421585	AUS/ACT/MFBM-2/2015	GI.2
MF421586	AUS/ACT/WC-2/2016	GI.2
MF421589	AUS/NSW/RUS-1/2016	GI.2
MF421593	AUS/NSW/BRH-1/2016	GI.2
MF421595	AUS/NSW/SGA-1/2016	GI.2
MF421597	AUS/SA/PAR-1/2015	GI.2
MF421599	AUS/SA/LYN-1/2016	GI.2
MF421600	AUS/SA/MUN-1/2016	GI.2
MF421601	AUS/SA/COO-1/2016	GI.2
MF421603	AUS/SA/KAL-1/2016	GI.2
MF421604	AUS/SA/KAL-2/2016	GI.2
MF421605	AUS/SA/LH-1/2016	GI.2
MF421606	AUS/SA/MAC-2/2016	GI.2
MF421608	AUS/SA/TUR-1607/2016	GI.2
MF421609	AUS/SA/TUR-1606/2016	GI.2
MF421610	AUS/SA/STR-1/2016	GI.2
MF421611	AUS/SA/KAL-3/2016	GI.2
MF421612	AUS/SA/MTO-2/2016	GI.2
MF421613	AUS/SA/BLAK-1/2016	GI.2
MF421614	AUS/SA/WS-1/2016	GI.2
MF421615	AUS/SA/MTO-1/2016	GI.2
MF421616	AUS/SA/LEA-1/2016	GI.2
MF421617	AUS/SA/CRK-1/2016	GI.2
MF421618	AUS/SA/BRA-1/2016	GI.2
MF421619	AUS/SA/COL-1/2016	GI.2
MF421620	AUS/SA/COL-2/2016	GI.2
MF421621	AUS/SA/ORO-1/2016	GI.2
MF421622	AUS/VIC/HAM-1/2016	GI.2
MF421623	AUS/VIC/HAM-2/2016	GI.2
MF421626	AUS/VIC/HAM-3/2016	GI.2
MF421627	AUS/VIC/BAH-1/2016	GI.2
MF421628	AUS/WA/PIC-1/2016	GI.2
MF421629	AUS/WA/CHI-1/2016	GI.2
MF421630	AUS/WA/CHI-2/2016	GI.2
MF421631	AUS/WA/PIC-2/2016	GI.2
MF421632	AUS/WA/WNN-1/2016	GI.2
MF421633	AUS/WA/MTBA-1/2016	GI.2
MF421634	AUS/WA/MTBA-2/2016	GI.2
MF421635	AUS/WA/WNP-1/2016	GI.2
MF421639	AUS/NSW/TAR-2/2015	GI.2
MF421642	AUS/NSW/COW-1/2015	GI.2
MF421643	AUS/NSW/ORAN-1/2015	GI.2
MF421645	AUS/NSW/EOR-1/2015	GI.2
MF421646	AUS/NSW/HIL-1/2015	GI.2
MF421647	AUS/NSW/BRO-1/2015	GI.2
MF421648	AUS/NSW/BRO-2/2015	GI.2
MF421649	AUS/NSW/BEGA-1/2015	GI.2
MF421650	AUS/NSW/BEGA-2/2015	GI.2
MF421652	AUS/NSW/GOU-1/2015	GI.2
MF421655	AUS/NSW/COB-1/2016	GI.2
MF421659	AUS/NT/DAR-1/2015	GI.2
MF421661	AUS/SA/MBR-1/2015	GI.2
MF421662	AUS/SA/ADL-1/2016	GI.2
MF421663	AUS/SA/NUR-1/2016	GI.2
MF421664	AUS/SA/ONK-1/2016	GI.2
MF421665	AUS/SA/MUN-3/2016	GI.2
MF421666	AUS/SA/MIL-1/2016	GI.2
MF421667	AUS/SA/NAI-1/2016	GI.2
MF421668	AUS/SA/ROB-1/2016	GI.2
MF421669	AUS/SA/REY-1/2016	GI.2
MF421670	AUS/SA/REY-2/2016	GI.2
MF421671	AUS/SA/KOO-1/2016	GI.2
MF421672	AUS/SA/GLE-1/2016	GI.2
MF421673	AUS/SA/BAL-2/2016	GI.2
MF421674	AUS/SA/BAL-3/2016	GI.2
MF421675	AUS/TAS/SPR-1/2016	GI.2
MF421676	AUS/VIC/KERANG-1/2015	GI.2
MF421677	AUS/VIC/WAN-1/2015	GI.2
MF421678	AUS/VIC/WIL-1/2015	GI.2
MF421679	AUS/VIC/WIL-2/2015	GI.2
MF421680	AUS/VIC/NEW-1/2016	GI.2
MF421681	AUS/VIC/NEW-3/2016	GI.2
MF421682	AUS/VIC/NEW-2/2016	GI.2
MF421683	AUS/VIC/WAR-2/2016	GI.2
MF421686	AUS/VIC/DUN-1/2016	GI.2
MF421687	AUS/VIC/DUN-2/2016	GI.2
MF421688	AUS/VIC/DUN-3/2016	GI.2
MF421689	AUS/VIC/AWA-4/2016	GI.2
MF421691	AUS/VIC/AWA-1/2016	GI.2
MF421692	AUS/VIC/STO-1/2016	GI.2
MF421693	AUS/VIC/MLB-1/2016	GI.2
MF421695	AUS/VIC/DON-1/2016	GI.2
MF421697	AUS/WA/YOR-1/2016	GI.2
MF421698	AUS/WA/PTH-3/2016	GI.2
MF421699	AUS/WA/ALB-3/2016	GI.2
MF421700	AUS/WA/LES-1/2016	GI.2
MG763936	SOS089	GI.2
MG763937	SOS125	GI.2
MG763938	SOS129	GI.2
MG763939	SOS133	GI.2
MG763940	SOS137	GI.2
MG763941	SOS140	GI.2
MG763942	SOS148	GI.2
MG763943	SOS149	GI.2
MG763944	SOS150	GI.2
MG763945	SOS151	GI.2
MG763946	SOS155	GI.2
MG763947	SOS158	GI.2
MG763948	SOS164	GI.2
MG763949	SOS173	GI.2
MG763950	SOS404	GI.2
MG763951	SOS468	GI.2
MG763952	SOS473	GI.2
MG763953	SOS474	GI.2
MG763954	SOS492	GI.2
KY247124	BrlS1PT16	GI.2
KY247125	BrlS2PT16	GI.2
MF407651	CBPico17-1	GI.2
MF407652	CBPico17-2	GI.2
MF407653	16PLM1	GI.2
MF407654	PSM2	GI.2
MF407655	CBMad17-1	GI.2
MF407656	CBMad17-2	GI.2
MF407657	CBMad17-3	GI.2
KJ957809	Malta12-1	GI.2
KJ957810	Malta12-2	GI.2
AJ319594	00-08_France	GI.1b
KJ943796	P143	GI.1b
KP090974	CB110	GI.1b
KP090975	CB154	GI.1b
KP129400	Bar01-11	GI.1b
KJ683903	23212-08	GI.1b
KJ683904	14393-PT06	GI.1b
Z24757	AST/89_Spain	GI.1b
Z29514	SD_France	GI.1b
Z49271	RHDV-AST89	GI.1b
KJ579156	CBPico13-05	GI.1c
KJ579157	CBPico13-12	GI.1c
KJ579158	CBPico13-26	GI.1c
KJ579159	CBPico13-31	GI.1c
KJ579160	CBPico13-32	GI.1c
KT006721	NZL/Canterbury/Lincoln/517	GI.1c
KT006734	AUS/SA/FlindersRanges	GI.1c
KJ606958	Gungahlin	GI.1c
AF231353	NZ	GI.1c
AF295785	Mexico89	GI.1c
DQ189078	SaudiArabia	GI.1c
EU003579	Italy90	GI.1c
EU003580	Korea90	GI.1c
FJ212323	RHF89	GI.1c
KF594473	Czechoslovakia-V351	GI.1c
EF558585	Hagenow	GI.1d
Y15427	Wriezen	GI.1d
KP144792	BLA_Poland	GI.1d
KJ683900	7898-PT13	GI.1d
FR823354	09-02_France	GI.1d
EF558576	Jena	GI.1d
EF558574	Wika	GI.1d
DQ189077	Bahrain	GI.1d
AY928268	Ireland18	GI.1d
AJ535094	95-10FR	GI.1d
HM623309	NJ-2009	GI.1a
KT003359	Balashiha-2011	GI.1a
KJ683902	51079-PT07	GI.1a
KF677011	STR2012	GI.1a
KF270630	Lug09-12	GI.1a
HE963222	Egypt	GI.1a
EU003582	UT-01	GI.1a
EF558581	Erfurt	GI.1a
DQ069281	whnChina02	GI.1a
AB300693	HokkaidoJPN	GI.1a
GQ166866	MRCV
AM268419	06-11_France
EF558587	Ashington
GU368902	BEN-35	GI.4
GU368903	GUN	GI.4
GU368904	CAT2-10	GI.4
GU368905	CAT2-5	GI.4
GU368906	MIC5-10	GI.4
GU368907	MIC4-6	GI.4
GU368908	OC-20	GI.4
GU368909	OC-21	GI.4
KJ923230	EBHSV_Italy	GII.1
KJ679564	V1070	GII.1
KJ679515	O4021	GII.1
JX195102	MI09	GII.1
FN689420	E04-35	GII.1
FN689421	E04-53	GII.1
AM933648	s0603	GII.1
AM933649	s0636	GII.1
AJ971304	E0251	GII.1
AJ971305	E01-01	GII.1
